# Supplementary material
Source: publisher site journal article supplement (https://www.dovepress.com/article/317319)
Supplement: Supplementary file 1 [file get_supplementary_file.php]

Table S1: Primers used in this research (5'-3')

| Name             | Sequence                     |
|------------------|------------------------------|
| MAL forward      | 5'- GCTGGGTGATGTTCGTGTCTG-3' |
| MAL reverse      | 5'- TGAGGCGCTGAGGTAAAAGA-3'  |
| CD274 forward    | 5'- TTGCTGAACGCCCCATACAA-3'  |
| CD274 reverse    | 5'-TGTCCCGTTCCAACACTGAG-3'   |
| CTLA4 forward    | 5'-CAAGTGCCTTCTGTGTGTGC-3'   |
| CTLA4 reverse    | 5'-GAGCGGTGTTTCAGGTCTTCA-3'  |
| LAG3 forward     | 5'-AAGAACGCTTTGTGTGGAGC-3'   |
| LAG3 reverse     | 5'-GTCTTGGTCGCCACTGTCTT-3'   |
| PDCD1LG2 forward | 5'-AGAGGGAAGTGAACAGTGCT-3'   |
| PDCD1LG2 reverse | 5'-TAGGCTCCAGAGGTGAGTCC-3'   |
| GAPDH forward    | 5'-AAGGTGAAGGTCGGAGTCAAC-3'  |
| GAPDH reverse    | 5'-GGGGTCATTGATGGCAACAATA-3' |

**Table S2 Results of Univariate Cox hazard analysis of DEGs**

| gene       | KM       | B        | SE       | HR       | HR.95L   | HR.95H   | p-value  |
|------------|----------|----------|----------|----------|----------|----------|----------|
| KIAA1324   | 8.98E-06 | -0.01107 | 0.002698 | 0.988995 | 0.983779 | 0.994239 | 4.11E-05 |
| EXPH5      | 7.94E-05 | -0.35541 | 0.105925 | 0.700888 | 0.569489 | 0.862605 | 0.000793 |
| LINC00313  | 0.000925 | 19.82252 | 5.835188 | 4.06E+08 | 4384.194 | 3.76E+13 | 0.000681 |
| HPDL       | 0.000171 | 0.091282 | 0.024828 | 1.095578 | 1.043541 | 1.15021  | 0.000236 |
| LINC01224  | 3.81E-05 | 0.131215 | 0.035993 | 1.140213 | 1.062548 | 1.223556 | 0.000267 |
| AC026336.3 | 2.60E-05 | -0.05348 | 0.016003 | 0.947923 | 0.918652 | 0.978126 | 0.000832 |
| RHBDD3     | 9.59E-06 | -0.07096 | 0.017466 | 0.931499 | 0.900151 | 0.963938 | 4.85E-05 |
| PLPP2      | 0.000147 | -0.03022 | 0.006688 | 0.970228 | 0.957593 | 0.983029 | 6.20E-06 |
| SIX1       | 0.000177 | 0.053282 | 0.014116 | 1.054727 | 1.025946 | 1.084316 | 0.00016  |
| RNF2P1     | 0.000183 | 1.476066 | 0.295111 | 4.375696 | 2.453851 | 7.802723 | 5.68E-07 |
| ASRGL1     | 0.000519 | -0.01203 | 0.003163 | 0.988045 | 0.981939 | 0.994189 | 0.000143 |
| AC012354.1 | 0.000109 | 0.384212 | 0.107148 | 1.468456 | 1.190301 | 1.811613 | 0.000336 |
| AC005381.1 | 0.000455 | 0.791278 | 0.154291 | 2.206214 | 1.630477 | 2.98525  | 2.92E-07 |
| C11orf72   | 0.000303 | 6.595059 | 1.395421 | 731.4718 | 47.46935 | 11271.51 | 2.29E-06 |
| C5orf34    | 0.000534 | 0.218154 | 0.049529 | 1.243779 | 1.128715 | 1.370572 | 1.06E-05 |
| LRRC37A9P  | 0.00085  | 4.746554 | 1.431868 | 115.1866 | 6.959754 | 1906.383 | 0.000917 |
| B4GALNT3   | 6.81E-08 | -0.0345  | 0.00949  | 0.966093 | 0.94829  | 0.984231 | 0.000278 |
| CRELD2     | 9.20E-06 | -0.07908 | 0.016674 | 0.923962 | 0.894255 | 0.954655 | 2.10E-06 |
| CIRBP      | 0.000315 | -0.0247  | 0.007394 | 0.9756   | 0.961564 | 0.989841 | 0.000835 |
| TRPM4      | 1.67E-05 | -0.04541 | 0.010766 | 0.955601 | 0.935648 | 0.975979 | 2.46E-05 |
| P2RX4      | 5.08E-07 | -0.18803 | 0.03835  | 0.828591 | 0.768593 | 0.893271 | 9.44E-07 |
| ACACB      | 7.50E-05 | 0.455655 | 0.127216 | 1.577205 | 1.229141 | 2.023834 | 0.000341 |
| STX18      | 2.09E-06 | -0.017   | 0.004188 | 0.983141 | 0.975104 | 0.991245 | 4.92E-05 |
| MACC1      | 0.000586 | 0.097776 | 0.025277 | 1.102716 | 1.049416 | 1.158722 | 0.00011  |
| AC110491.1 | 0.000603 | 3.122436 | 0.905538 | 22.70161 | 3.848232 | 133.922  | 0.000564 |
| LSM7       | 1.66E-05 | -0.02089 | 0.005211 | 0.979327 | 0.969375 | 0.989381 | 6.11E-05 |
| MSX1       | 6.27E-06 | -0.00241 | 0.000598 | 0.997594 | 0.996426 | 0.998763 | 5.56E-05 |
| DGKG       | 0.000234 | 0.915455 | 0.256074 | 2.497913 | 1.51219  | 4.12618  | 0.00035  |
| TTK        | 0.000943 | 0.116523 | 0.029696 | 1.123584 | 1.060055 | 1.190919 | 8.71E-05 |
| ACOXL      | 0.00055  | 1.004649 | 0.264698 | 2.730947 | 1.625555 | 4.588017 | 0.000147 |
| THRB       | 0.000228 | 0.210216 | 0.052755 | 1.233944 | 1.112732 | 1.36836  | 6.75E-05 |
| SLC8A1     | 0.000111 | 0.288394 | 0.067964 | 1.334282 | 1.167876 | 1.5244   | 2.20E-05 |
| AC015849.5 | 0.000538 | 2.275498 | 0.533262 | 9.732762 | 3.422334 | 27.67897 | 1.98E-05 |
| PHACTR3    | 0.000323 | 0.790253 | 0.172652 | 2.203954 | 1.571233 | 3.091466 | 4.71E-06 |
| MAL        | 0.000131 | 0.002553 | 0.000638 | 1.002557 | 1.001304 | 1.003811 | 6.26E-05 |
